# Supplementary material
Source: PubMed Central journal article supplement (PMC6864009)
Supplement: 12264_2019_421_MOESM1_ESM.pdf [file 12264_2019_421_MOESM1_ESM.pdf]

Supplementary Materials

**Gedunin Degrades Aggregates of Mutant Huntingtin Protein and Intranuclear Inclusions *via* the Proteasomal Pathway in Neurons and Fibroblasts from Patients with Huntington's Disease**

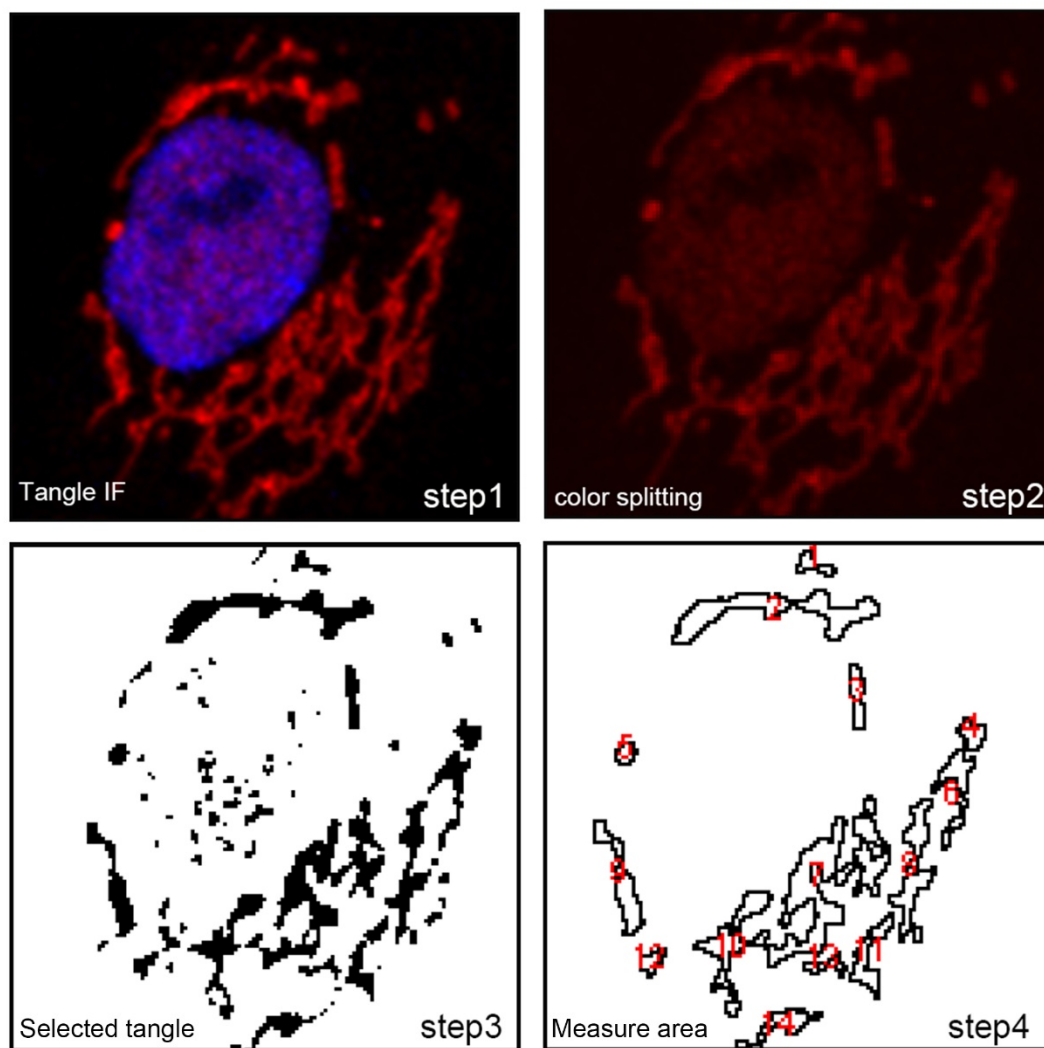

**Fig. S1** Steps in measurement of the 3B5H10-positive area in fibroblasts using ImageJ. Step 1: images stacked by maximum intensity. Step 2: separation of the color image by the color-splitting channel. Step 3: skeletonization of the tangle structure. Step 4: measurement of the tangle area with the particle-analyzing panel.

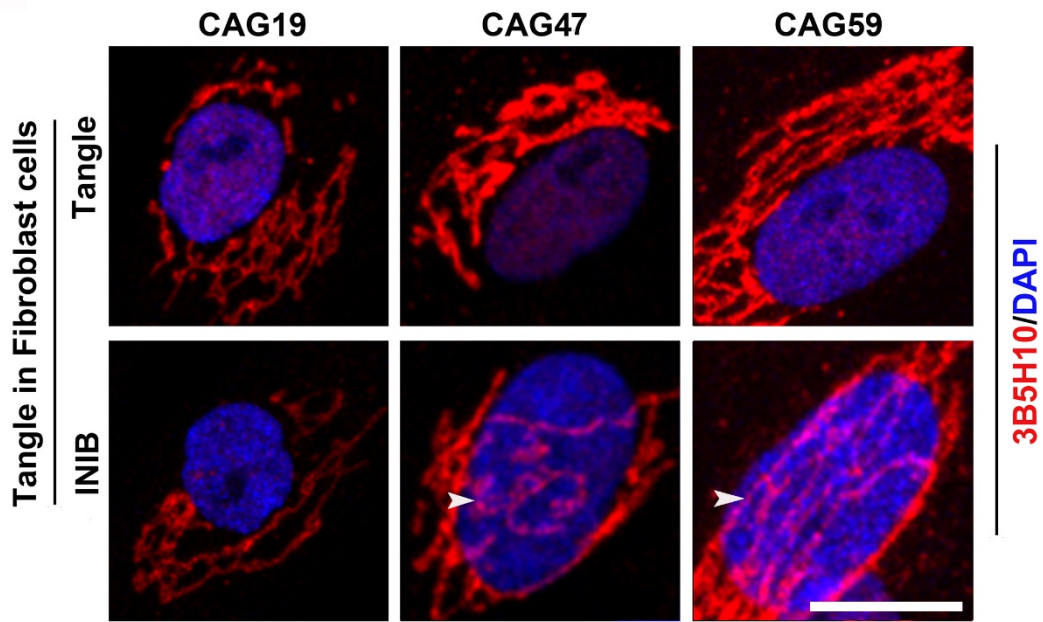

**Fig. S2** Representative high-resolution images of 3B5H10-stained tangles in fibroblasts from an HD patient and a healthy sibling. The size of 3B5H10-stained tangles in the HD patient were observably larger than those in the healthy sibling. The intranuclear 3B5H10-stained tangles in the HD patient were clearly bigger than those in the healthy sibling. Scale bar, 10  $\mu$ m.
